# Supplementary material
Source: PubMed Central journal article supplement (PMC10017372)
Supplement: NIHMS1836903-supplement-tS1.pdf [file NIHMS1836903-supplement-tS1.pdf]

**Table S1: Differentially expressed ncRNAs in men with poor sperm quality relative to their normal controls.**

| miRNA species     |       |           |           |                      |                      |                |                        |              |          |        |        |        |       |      |
|-------------------|-------|-----------|-----------|----------------------|----------------------|----------------|------------------------|--------------|----------|--------|--------|--------|-------|------|
| species           | chr   | start     | end       | logFC                | logCPM               | Pvalue         | padj                   | FC           |          |        |        |        |       |      |
| hsa-mir-7110      | chr3  | 123161794 | 123161879 | 1.04                 | 13.89                | 2.1E-05        | 1.5E-03                | 2.06         |          |        |        |        |       |      |
| hsa-mir-4800      | chr4  | 2250077   | 2250156   | 0.95                 | 5.86                 | 7.7E-05        | 2.8E-03                | 1.94         |          |        |        |        |       |      |
| hsa-miR-4488      | chr11 | 61508596  | 61508657  | 0.71                 | 8.25                 | 3.2E-04        | 7.5E-03                | 1.63         |          |        |        |        |       |      |
| hsa-mir-4488      | chr11 | 61508596  | 61508657  | 0.69                 | 8.32                 | 4.1E-04        | 7.5E-03                | 1.61         |          |        |        |        |       |      |
| hsa-mir-3916      | chr1  | 247201967 | 247202060 | 0.90                 | 9.80                 | 1.1E-03        | 1.6E-02                | 1.87         |          |        |        |        |       |      |
| hsa-mir-4508      | chr15 | 23562062  | 23562131  | 0.85                 | 9.24                 | 2.6E-03        | 3.2E-02                | 1.80         |          |        |        |        |       |      |
| circRNA species   |       |           |           |                      |                      |                |                        |              |          |        |        |        |       |      |
| species           | chr   | start     | end       | ensemblID            | gene_name            | logFC          | logCPM                 | Pvalue       | padj     | FC     |        |        |       |      |
| hsa_circ_0009013  | chr3  | 195101737 | 195133645 | NM_012287            | ACAP2                | 2.37           | 6.96                   | 9.19E-11     | 1.53E-07 | 5.16   |        |        |       |      |
| hsa_circ_0123184  | chr3  | 195131435 | 195133645 | NM_012287            | ACAP2                | 2.31           | 6.93                   | 5.37E-10     | 4.48E-07 | 4.95   |        |        |       |      |
| hsa_circ_0134168  | chr1  | 78105133  | 78141374  | ENST00000370801.3    | ZZZ3                 | -3.03          | 10.00                  | 1.08E-08     | 5.98E-06 | 0.12   |        |        |       |      |
| hsa_circ_0139507  | chrX  | 102733063 | 102785825 | ENST00000372633.1    | RAB40A               | 1.80           | 5.79                   | 5.08E-08     | 2.12E-05 | 3.48   |        |        |       |      |
| hsa_circ_0139505  | chrX  | 102730028 | 102752541 | ENST00000445990.1    | LLOXNC01-250H12.3    | 1.56           | 5.19                   | 7.69E-07     | 2.56E-04 | 2.94   |        |        |       |      |
| hsa_circ_0139508  | chrX  | 102733063 | 102786112 | TCONS_00017354       | TCONS_00017354       | 1.49           | 5.23                   | 1.75E-06     | 4.26E-04 | 2.81   |        |        |       |      |
| hsa_circ_0001488  | chr5  | 59092885  | 59179746  | NM_001104631         | PDE4D                | -2.29          | 6.73                   | 1.79E-06     | 4.26E-04 | 0.20   |        |        |       |      |
| hsa_circ_0005447  | chr3  | 194928153 | 194947585 | NM_152531            | XXYL1                | 1.15           | 6.14                   | 4.24E-06     | 8.84E-04 | 2.21   |        |        |       |      |
| hsa_circ_0135261  | chr8  | 100286425 | 100341142 | ENST00000399596.1    | VPS13B               | 1.10           | 4.68                   | 5.83E-06     | 1.08E-03 | 2.14   |        |        |       |      |
| hsa_circ_0103367  | chr15 | 36960311  | 37002162  | ENST00000569302.1    | C15orf41             | -1.42          | 7.68                   | 1.91E-05     | 3.18E-03 | 0.37   |        |        |       |      |
| hsa_circ_0126706  | chr4  | 58094439  | 58179531  | None                 | None                 | 1.01           | 5.94                   | 3.33E-05     | 5.05E-03 | 2.01   |        |        |       |      |
| hsa_circ_0009684  | chr1  | 10093040  | 10241296  | NM_001105562         | UBE4B                | -1.24          | 8.26                   | 5.23E-05     | 7.27E-03 | 0.42   |        |        |       |      |
| hsa_circ_0096701  | chr11 | 88301086  | 88386432  | ENST00000418177.2    | GRM5                 | 0.86           | 6.80                   | 8.47E-05     | 1.09E-02 | 1.82   |        |        |       |      |
| hsa_circ_0119752  | chr2  | 32142994  | 32181667  | NM_015955            | MEMO1                | -1.12          | 5.72                   | 9.33E-05     | 1.11E-02 | 0.46   |        |        |       |      |
| hsa_circ_0130725  | chr6  | 132539368 | 132564599 | None                 | None                 | 1.14           | 5.74                   | 1.38E-04     | 1.53E-02 | 2.21   |        |        |       |      |
| hsa_circ_0132863  | chr7  | 104306290 | 104377358 | NM_199000            | LHFPL3               | -0.77          | 10.46                  | 1.88E-04     | 1.96E-02 | 0.59   |        |        |       |      |
| hsa_circ_0056159  | chr2  | 113856936 | 113891590 | NM_173843            | IL1RN                | -1.76          | 7.06                   | 2.18E-04     | 2.02E-02 | 0.30   |        |        |       |      |
| hsa_circ_0128521  | chr5  | 167302990 | 167308471 | NM_001122679         | ODZ2                 | 1.09           | 7.31                   | 2.37E-04     | 2.08E-02 | 2.12   |        |        |       |      |
| hsa_circ_0063775  | chr22 | 46449725  | 46494438  | NR_027034            | LOC150381            | 0.62           | 4.43                   | 2.86E-04     | 2.35E-02 | 1.53   |        |        |       |      |
| hsa_circ_0098728  | chr12 | 51001307  | 51034635  | NM_173602            | DIP2B                | -1.24          | 13.53                  | 2.96E-04     | 2.35E-02 | 0.42   |        |        |       |      |
| hsa_circ_0120217  | chr2  | 48686954  | 48698323  | NR_024188            | PPP1R21              | -1.58          | 7.36                   | 3.16E-04     | 2.39E-02 | 0.34   |        |        |       |      |
| hsa_circ_0115951  | chr21 | 37744829  | 37747401  | ENST00000400485.1    | MORC3                | 1.03           | 6.72                   | 3.37E-04     | 2.44E-02 | 2.05   |        |        |       |      |
| hsa_circ_0036948  | chr15 | 92397564  | 92671719  | NM_013272            | SLCO3A1              | 0.78           | 6.29                   | 4.21E-04     | 2.93E-02 | 1.72   |        |        |       |      |
| hsa_circ_0123091  | chr3  | 189983080 | 190032848 | ENST00000295522.3    | CLDN1                | 0.92           | 4.24                   | 4.56E-04     | 3.04E-02 | 1.89   |        |        |       |      |
| hsa_circ_0136453  | chr8  | 35828130  | 35902033  | ENST00000523748.1    | RP11-473J6.1         | -0.86          | 7.99                   | 5.05E-04     | 3.23E-02 | 0.55   |        |        |       |      |
| hsa_circ_0004923  | chr2  | 109389501 | 110598981 | NM_001099289         | SH3RF3               | -0.69          | 7.35                   | 5.40E-04     | 3.33E-02 | 0.62   |        |        |       |      |
| hsa_circ_0108420  | chr18 | 39661086  | 39739441  | ENST00000262039.4    | PIK3C3               | 0.73           | 8.56                   | 6.49E-04     | 3.86E-02 | 1.66   |        |        |       |      |
| hsa_circ_0129336  | chr5  | 64493019  | 64509953  | ENST00000314351.5    | ADAMTS6              | -0.75          | 11.11                  | 7.35E-04     | 4.09E-02 | 0.60   |        |        |       |      |
| hsa_circ_0132209  | chr6  | 72816211  | 72892852  | ENST00000348717.5    | RIMS1                | 0.81           | 4.76                   | 8.18E-04     | 4.26E-02 | 1.76   |        |        |       |      |
| hsa_circ_0139547  | chrX  | 109263579 | 109352374 | NM_032227            | TMEM164              | 0.74           | 5.44                   | 8.21E-04     | 4.26E-02 | 1.67   |        |        |       |      |
| hsa_circ_0113676  | chr1  | 57120676  | 57140195  | NM_006252            | PRKAA2               | -1.51          | 9.70                   | 8.51E-04     | 4.26E-02 | 0.35   |        |        |       |      |
| hsa_circ_0100429  | chr13 | 39311053  | 39358945  | NM_207361            | FREM2                | -0.93          | 5.91                   | 9.11E-04     | 4.26E-02 | 0.53   |        |        |       |      |
| hsa_circ_0024724  | chr11 | 123430969 | 123465546 | NM_020716            | GRAMD1B              | 0.76           | 4.71                   | 9.55E-04     | 4.30E-02 | 1.69   |        |        |       |      |
| hsa_circ_0113744  | chr1  | 61195246  | 61231292  | TCONS_000000081      | TCONS_000000081      | -0.99          | 5.45                   | 1.11E-03     | 4.87E-02 | 0.50   |        |        |       |      |
| piRNA species     |       |           |           |                      |                      |                |                        |              |          |        |        |        |       |      |
| species           | chr   | start     | end       | Ensembl geneID       | genetype             | genename       | distance               | logFC        | logCPM   | pvalue | padj   | FC     |       |      |
| piR-hsa-26399     | chr11 | 85195043  | 85195070  | ENSG00000150672.18_1 | protein_coding;      | DLG2           | 0                      | -1.55        | 9.66     | 0.0001 | 0.008  | 0.34   |       |      |
| piR-hsa-28160     | chr19 | 50607227  | 50607253  | ENSG00000267890.1_1  | lncRNA;              | CTD-2126E3.4   | -28069                 | 1.36         | 8.27     | 0.0004 | 0.020  | 2.57   |       |      |
| piR-hsa-28478     | chr2  | 230045585 | 230045613 | ENSG00000153823.19_1 | protein_coding;      | PID1           | 0                      | -1.83        | 12.57    | 0.0001 | 0.008  | 0.28   |       |      |
| piR-hsa-1077      | chr5  | 71146846  | 71146874  | ENSG00000278824.1_1  | processed_pseudogene | RP11-1315F8.2  | 0                      | -1.58        | 10.08    | 0.0002 | 0.009  | 0.33   |       |      |
| rRNA species      |       |           |           |                      |                      |                |                        |              |          |        |        |        |       |      |
| RNAcentral_ID     | chr   | start     | end       | Gene_ID              | Full Name            | logFC          | logCPM                 | pvalue       | padj     | FC     |        |        |       |      |
| URS00008C6BF7     | chr21 | 8210477   | 8211461   | RNA18S1              | SSU                  | -1.31          | 8.08                   | 0.0001       | 0.02     | 0.40   |        |        |       |      |
| URS00008C9E2E     |       |           |           | AC090637.2           | SSU                  | 0.97           | 7.85                   | 0.0006       | 0.03     | 1.96   |        |        |       |      |
| URS0000914753     | chr8  | 68306274  | 68306589  | RFO2543              | LSU                  | -0.68          | 4.41                   | 0.0007       | 0.03     | 0.63   |        |        |       |      |
| URS0000CADD60     | chr21 | 8213888   | 8218941   | RNA28S               | LSU                  | 0.73           | 8.46                   | 0.0008       | 0.03     | 1.66   |        |        |       |      |
| URS00008CE4BC     |       |           |           | AC079965.5           | SSU                  | 0.98           | 8.11                   | 0.0010       | 0.03     | 1.97   |        |        |       |      |
| URS00008CBFC      | chr21 | 8210483   | 8211470   | SSURNA               | SSU                  | -1.12          | 6.96                   | 0.0016       | 0.04     | 0.46   |        |        |       |      |
| lncRNA species    |       |           |           |                      |                      |                |                        |              |          |        |        |        |       |      |
| RNAcentral_ID     | chr   | start     | end       | Name                 | Source               | EnsembleGene   | Type                   | Name         | Dist     | logFC  | logCPM | pvalue | padj  | FC   |
| URS00005G6E09     | chr1  | 214274503 | 214281505 | Lnc-PTPN14-2-6       | LNCipedia            | ENSG0000028351 | lncRNA                 | LINC02775    | 0        | 1.33   | 9.49   | 0.0002 | 0.020 | 2.51 |
| URS00005AE24      | chr1  | 214279570 | 214281505 | Lnc-PTPN14-2-7       | LNCipedia            | ENSG0000028351 | lncRNA                 | LINC02775    | 0        | 1.34   | 9.39   | 0.0002 | 0.020 | 2.53 |
| URS0000A7764F     | chr10 | 42871521  | 42874060  | LINC02623            | HGNC                 | ENSG0000021514 | Unprocessed_pseudogene | RP11-313J2.1 | -8100    | 0.74   | 11.47  | 0.0004 | 0.029 | 1.67 |
| ENST00000631211.1 | chr21 | 8210384   | 8211306   | Lnc-KCNE1B           | LNCipedia            | ENSG0000027999 | processed_pseudogene   | RPSAP68      | 1281074  | 0.72   | 13.15  | 0.0002 | 0.020 | 1.64 |
| ENST00000629969.1 | chr21 | 8254592   | 8255514   | KCNE1B-157           | LNCipedia            | ENSG0000027999 | processed_pseudogene   | RPSAP68      | 1236866  | 0.78   | 13.03  | 0.0001 | 0.020 | 1.72 |
| URS0000EABF79     | chr6  | 5778210   | 5779345   | HSALNT0100579        | LncBook              | ENSG0000014598 | protein_coding         | FARS2        | 0        | 1.41   | 9.33   | 0.0001 | 0.020 | 2.65 |
| URS0000E9C93      | NA    | NA        | NA        | NA                   | NA                   | NA             | NA                     | NA           | NA       | -1.13  | 7.74   | 0.0006 | 0.039 | 0.46 |
